# Supplementary material for: A Simple and Reliable Dispersive Liquid-Liquid Microextraction with Smartphone-Based Digital Images for Determination of Carbaryl Residues in Andrographis paniculata Herbal Medicines Using Simple Peroxidase Extract from Senna siamea Lam. Bark
Source: MDPI journal article supplement (doi:10.3390/molecules27103261), 2022-05-19
Supplement: s1 [file s1]

Supplementary Material

# A Simple and Reliable Dispersive Liquid-Liquid Microextraction with Smartphone-Based Digital Images for Determination of Carbaryl Residues in *Andrographis paniculata* Herbal Medicines Using Simple Peroxidase Extract from *Senna siamea* Lam. Bark

Sam-ang Supharoek <sup>1,2</sup>, Watsaka Siriangkhawut <sup>3</sup>, Kate Grudpan <sup>4</sup> and Kraingkrai Ponghong <sup>3,\*</sup>

<sup>1</sup> Department of Chemistry and Center of Excellence for Innovation in Chemistry, Faculty of Science, Mahidol University, Bangkok 10400, Thailand; samang.sup@mahidol.ac.th

<sup>2</sup> Department of Medical Science, Mahidol University, Amnatcharoen Campus, Amnat Charoen 37000, Thailand

<sup>3</sup> Creative Chemistry and Innovation Research Unit, Department of Chemistry and Center of Excellence for Innovation in Chemistry, Faculty of Science, Mahasarakham University, Maha Sarakham 44150, Thailand; watsaka@hotmail.com

<sup>4</sup> Department of Chemistry, Faculty of Science and Center of Excellence for Innovation in Analytical Science and Technology for Biodiversity-based Economic and Society, Chiang Mai University, Chiang Mai 50200, Thailand; kgrudpan@gmail.com

\* Correspondence: kraingkrai.p@msu.ac.th; Tel.: +66-43754-246

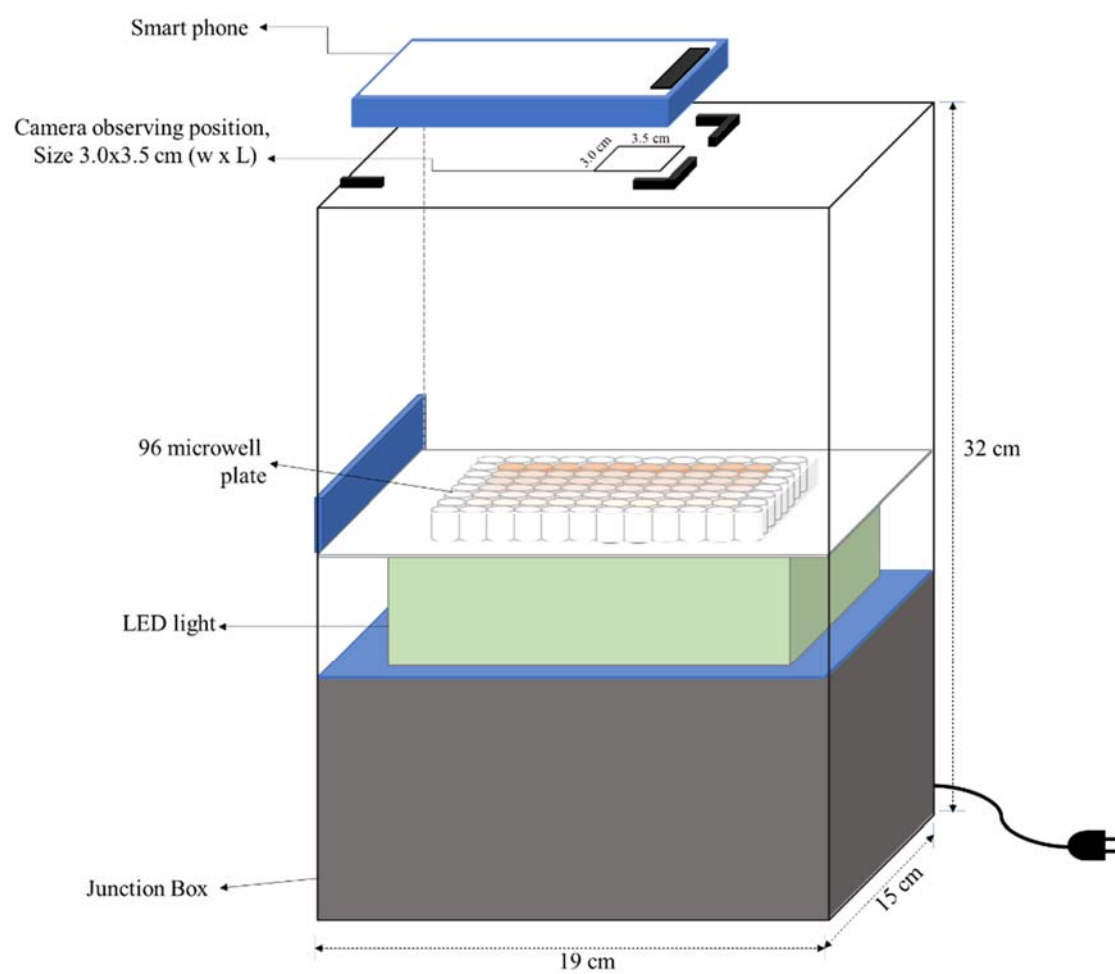

**Figure S1.** Light control box for smartphone-based digital imaging for the determination of carbaryl.

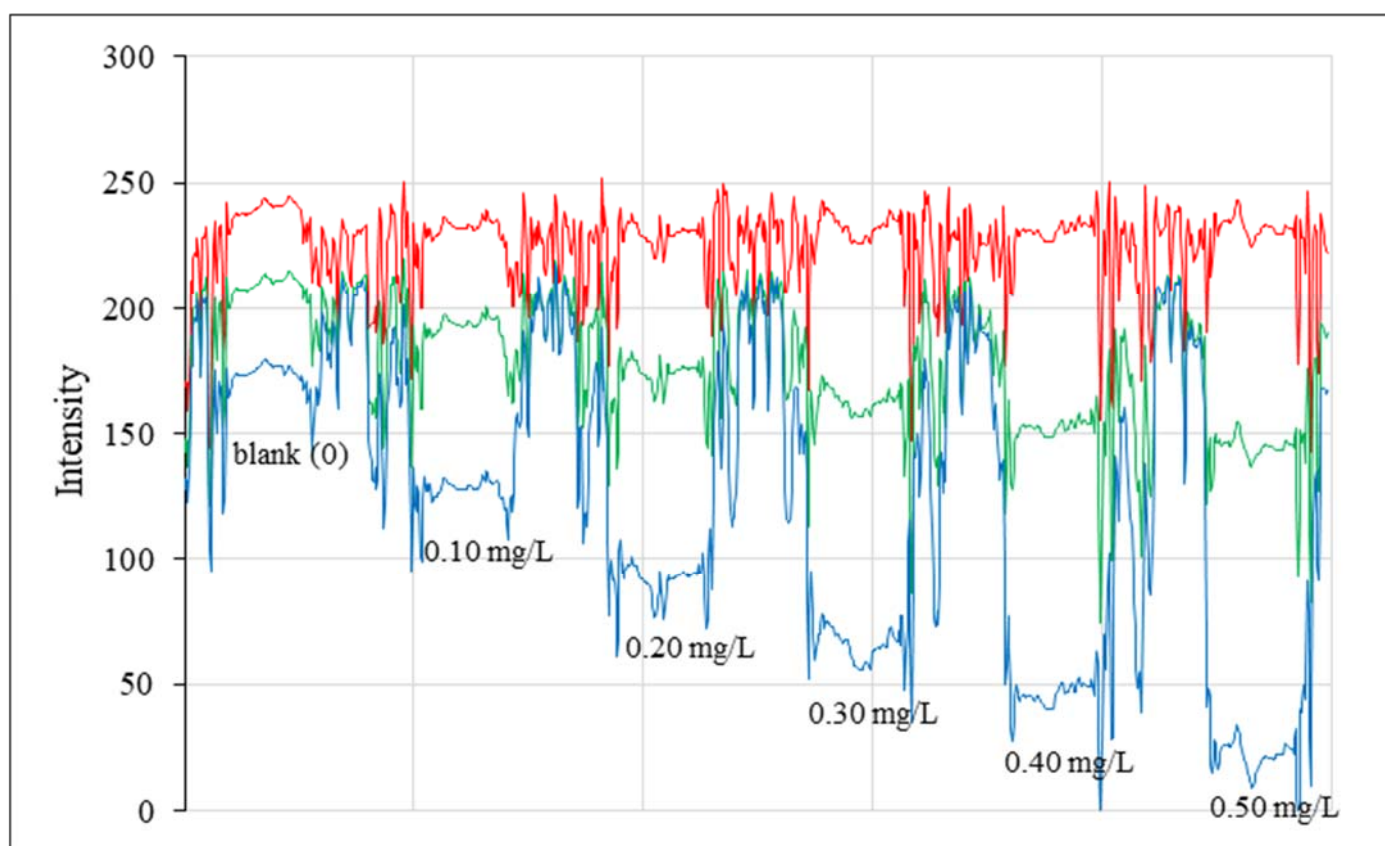

**Figure S2.** RGB profile plots of color intensities obtained from smartphone-based digital imaging in the enzymatic reaction and DLLME in a light control box for carbaryl in the range 0–0.50 mg·L<sup>-1</sup>.

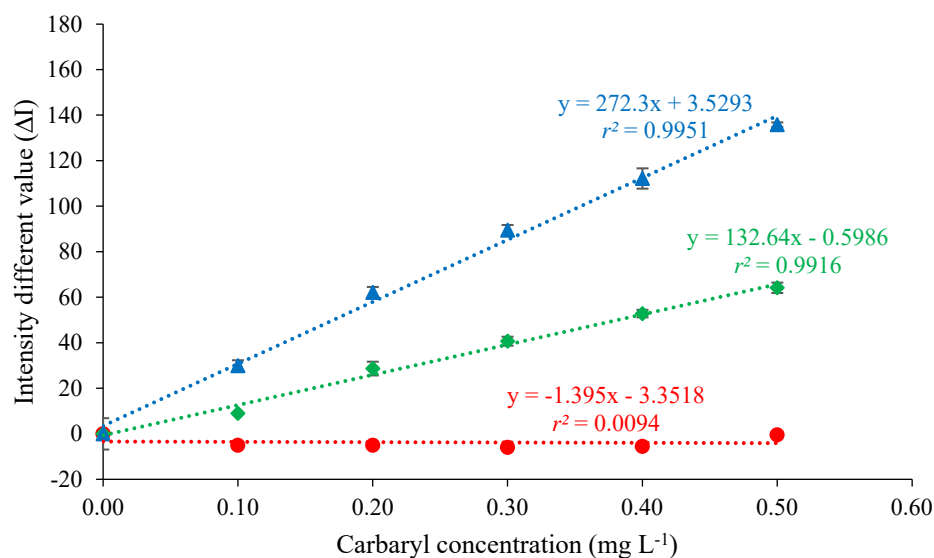

**Figure S3.** Plots of intensity difference (delta intensity) versus carbaryl concentration: (a) delta red intensity (b) delta green intensity, and (c) delta blue intensity, (delta intensity being the intensity due to that carbaryl concentration subtracted by that of blank).

**Table S1.** Summarized selected conditions of smartphone-based digital images with DLLME for the determination of carbaryl residues.

| Parameter                                               | Studied Condition                                    | Selected Condition |
|---------------------------------------------------------|------------------------------------------------------|--------------------|
| pH                                                      | 3–7                                                  | 6                  |
| 4-aminoantipyrine concentration (mg·L <sup>-1</sup> )   | 50–200                                               | 150                |
| Hydrogen peroxide concentration (mmol·L <sup>-1</sup> ) | 0.01–1.0                                             | 0.3                |
| Volume of enzyme (μL)                                   | 10–200                                               | 150                |
| Incubation time (min)                                   | 1–20                                                 | 10                 |
| Type of extraction solvent                              | Chloroform, dichloromethane, octanol and 1-dodecanol | Dichloromethane    |
| Volume of extraction solvent (μL)                       | 100–700                                              | 500                |
| Type of dispersive solvent                              | Acetonitrile, ethanol, methanol and acetone          | Ethanol            |
| Volume of dispersive solvent (μL)                       | 100–700                                              | 300                |
| Ionic strength (%w/v)                                   | 0.6–1.4                                              | 1.0                |
| Vortex time (min)                                       | 0.1–3                                                | 1                  |
| Centrifugation time (min)                               | 1–10                                                 | 7                  |
